7. Rawal N, Mollefors K, Axelsson K, Lingardh G, Widman B: An experimental study of urodynamic effects of epidural morphine and of naloxone reversal. *Anesth Analg* 62:641-647, 1983
8. Cousins MJ, Mather LE: Intrathecal and epidural administration of opioids. *ANESTHESIOLOGY* 61:276-310, 1984
9. Jasinski DR, Mansky PA: Evaluation of nalbuphine for abuse potential. *Clin Pharmacol Ther* 13:78-90, 1972
10. Latach L, Probst S, Dudziak R: Reversal by nalbuphine of respiratory depression caused by fentanyl. *Anesth Analg* 63:814-816, 1984
11. Baise A, McMichan JC, Nugent M, Hollier LH: Nalbuphine produces side-effects while reversing narcotic-induced respiratory depression. *Anesth Analg* 65:S19, 1986
12. Hammond JE: Reversal of opioid-associated late onset respiratory depression by nalbuphine hydrochloride. *Lancet* 2(8413):1208, 1984
13. Penning JP, Samson B, Baxter A: Nalbuphine reverses epidural morphine induced respiratory depression. *Anesth Analg* 65:S119, 1986
14. Romagnoli A, Keats AS: Ceiling effect for respiratory depression by nalbuphine. *Clin Pharmacol Ther* 27:478-485, 1980
15. Schmauss C, Yaksh TL: *In vivo* studies on spinal opiate receptor systems mediating antinociception. II. Pharmacological profiles suggesting a differential association of mu, delta and kappa receptors with visceral chemical and cutaneous thermal stimuli in the rat. *J Pharmacol Exp Ther* 228:1-12, 1984
16. Schmauss C, Doherty C, Yaksh TL: The analgesic effects of an intrathecally administered partial opiate agonist, nalbuphine hydrochloride. *Eur J Pharmacol* 86:1-7, 1983
17. Gjessing J, Tomlin PJ: Postoperative pain control with intrathecal morphine. *Anaesthesia* 36:268-276, 1981
18. Wakefield RD, Mesaros M: Reversal of pruritus, secondary to epidural morphine, with the narcotic agonist/antagonist nalbuphine (Nubain®) (abstract). *ANESTHESIOLOGY* 63:A255, 1985

Anesthesiology  
65:218-219, 1986

## Anesthetic Management of a Patient with Dutch-Kentucky Syndrome

FREDERICK H. BROWDER, M.D.,\* DANIEL LEW, D.D.S.,† TIMOTHY S. SHAHBAZIAN, D.D.S.‡

We describe a patient with Dutch-Kentucky syndrome, a relatively rare condition that is inherited as an autosomal dominant trait and is characterized primarily by extremely limited ability to open the mouth and also by flexion deformity of the fingers that occurs with extension of the wrist.

### REPORT OF A CASE

A 13.2 kg (less than fifth percentile for age) 4-yr-old boy with trismus-pseudocamptodactyly (Dutch-Kentucky) syndrome was scheduled for bilateral removal of the coronoid processes of the mandible. Past medical history and review of symptoms were unremarkable with the exception of his genetic disorder. The parents stated that the patient had never been able to eat solid foods nor had he been able to put a fork or spoon in his mouth. Family history revealed three relatives (two cousins, one uncle) with the same genetic syndrome, but no one in the patient's immediate family was affected.

On physical examination, he was a pleasant, apparently socially well-adjusted child who appeared small for his age. His maximum intermaxillary opening was 5 mm (fig. 1). The remainder of the external examination of the airway was unremarkable. Preoperative vital signs

included an arterial blood pressure of 100/50 mmHg, heart rate 110 beats/min, respiratory rate of 24 breaths/min, and a temperature of 96.6° F. The preoperative laboratory values, including a clotting profile, were within normal limits.

Following premedication with diazepam, 2.5 mg po (swallowed without difficulty), and atropine, 0.1 mg im, the child was taken to the operating room where blood pressure cuff, precordial stethoscope, and ECG were placed. With a surgeon experienced in pediatric emergency tracheostomy in attendance, an inhalation induction of anesthesia was performed with no problems, using O<sub>2</sub>/N<sub>2</sub>O and halothane. The patient was easily ventilated via a face mask, and no muscle relaxants were used. When a satisfactory plane of anesthesia was achieved, the anesthetic mixture was changed to halothane in 100% O<sub>2</sub>.

After three unsuccessful attempts at blind nasotracheal intubation, fiberoptic nasotracheal intubation was successfully performed with a 5.0 uncuffed Sheridan® endotracheal tube over an Olympus® pediatric flexible bronchoscope. Sixty seconds was the maximum time period allowed for each intubation attempt, at which point the patient was again ventilated for 60 s with 100% O<sub>2</sub>/halothane via face mask. At no time during the ventilation/intubation sequence did bradycardia, hypotension, or cyanosis occur. The decision to limit each intubation attempt to 60 s was an arbitrary one.

Successful endotracheal intubation was confirmed by the presence of equal bilateral breath sounds. Bilateral coronoidectomy was performed in conjunction with stretching of the patient's contracted masseter muscles to 30 mm, accompanied by insertion of a bite block. The vital signs remained stable throughout the procedure, which lasted 4 h, the patient being maintained on O<sub>2</sub>/N<sub>2</sub>O and isoflurane. One hour into the case, dexamethasone, 2 mg iv, was administered in an attempt to decrease any postoperative airway edema.

The decision had been made to keep the trachea intubated overnight; therefore, fentanyl 75 µg incrementally and droperidol 0.625 mg iv were given as the procedure progressed. Subsequently, the patient was taken to the intensive care unit, and 40% O<sub>2</sub> was administered by T-tube. The trachea was extubated the morning after surgery and several hours later the patient was sent to the ward.

\* Assistant Professor of Anesthesiology.

† Associate Professor and Chief, Department of Oral Surgery.

‡ Chief Resident, Department of Oral Surgery.

Received from the Departments of Anesthesiology and Oral Surgery, School of Medicine, Shreveport, Louisiana State University Medical Center, Shreveport, Louisiana 71130-3932. Accepted for publication March 13, 1986.

Address reprint requests to Dr. Browder.

Key words: Anesthesia: pediatric. Genetic: Dutch-Kentucky syndrome. Intubation: fiberoptic.

### DISCUSSION

Several articles have appeared during the last 15 yr in the genetics literature delineating the characteristics of trismus-pseudocamptodactyly syndrome (TPS, or Dutch-Kentucky syndrome).<sup>1,§¶</sup> The syndrome was originally described by Hecht and Beals from Oregon and by Wilson *et al.* from Vanderbilt in 1968.<sup>§¶</sup> The eponym of Dutch-Kentucky syndrome was proposed in 1974 by Mabry *et al.*<sup>1</sup> from Kentucky after performing an extensive pedigree of a Kentucky family; the earliest affected family member that they were able to trace was a young Dutch girl who immigrated to the southern United States circa 1780, hence, the term Dutch-Kentucky. The syndrome is a relatively rare, autosomal dominant condition that is characterized by two primary features: 1) decreased ability to open the mouth (trismus); and 2) flexion deformity of the fingers that occurs with wrist extension (pseudocamptodactyly). Foot deformities and shorter-than-normal stature are frequently seen, although they are not characteristic.<sup>2</sup>

Robertson *et al.*,<sup>3</sup> in a six-generation family study, determined that TPS has variable expressivity, but that there was no evidence of reduced penetrance. ter Haar and von Hoof<sup>4</sup> proposed that enlarged coronoid processes were the cause of the trismus. Mercuri<sup>5</sup> postulated that not all TPSs have enlarged coronoid processes; he proposed that the trismus may also be due to an abnormal ligament extending from the maxilla to the mandible anterior to the masseter muscles. The same author reported that general anesthesia was administered following an awake blind nasotracheal intubation in this adult. Yamashita and Arner<sup>6</sup> had reported a 4-yr-old child who had an elective tracheostomy performed 4 days prior to coronoid resection.

In our case report, the airway was managed by fiberoptic nasotracheal intubation, a joint decision by both the anesthesia and oral surgery teams to avoid tracheostomy in a child this small, if possible. We would recommend

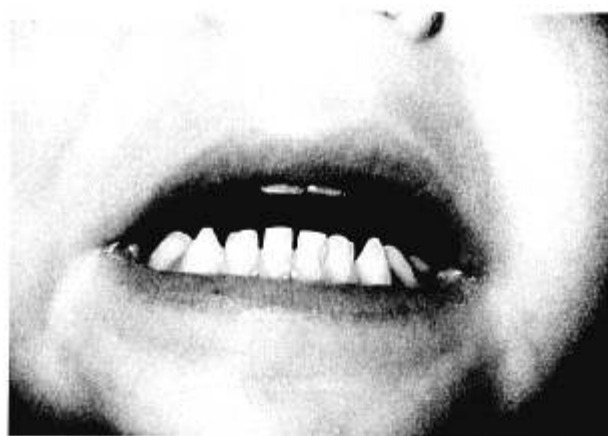

FIG. 1. Dutch-Kentucky syndrome. Frontal view of patient with mouth opened to fullest extent (5 mm).

that the anesthetist/anesthesiologist choose between blind or fiberoptic tracheal intubation according to their individual skills, with either the oral or nasal route as predicated by accessibility and surgical needs. Although neither pulse oximetry nor transcutaneous oxygen monitoring was available to us, we would recommend their use if available, but do not feel that their absence should indicate postponing surgery or transferring the patient to another institution. An amendment to our technique would be to include insufflation of 100% oxygen during any intubation attempt on such a child. While many approaches to the "difficult airway" have been described, we describe our approach to a relatively rare condition that, because it is inherited as an autosomal dominant trait, may be seen with increasing frequency by anesthesiologists.

### REFERENCES

1. Mabry CC, Barnett IS, Hutcheson MW: Trismus pseudocamptodactyly syndrome: Dutch-Kentucky syndrome. *J Pediatr* 85: 503-508, 1974
2. O'Brien PG, Gropper PT, Tredwell, et al: Orthopaedic aspects of the trismus-pseudocamptodactyly syndrome. *J Pediatr Orthop* 4:469-471, 1984
3. Robertson RD, Spence MA, Sparkes RS, et al: Linkage analysis with the trismus-pseudocamptodactyly syndrome. *Am J Med Genet* 12:115-120, 1982
4. ter Haar BGA, von Hoof RF: The trismus-pseudocamptodactyly syndrome. *J Med Genet* 11:41-49, 1974
5. Mercuri LG: The Hecht, Beals and Wilson syndrome. *J Oral Maxillofac Surg* 39:53-56, 1981
6. Yamashita DR, Arnet GF: Trismus-pseudocamptodactyly syndrome. *J Oral Maxillofac Surg* 38:625-630, 1980

§ Hecht F, Beals RK: Inability to open the mouth fully; an autosomal dominant phenotype with facultative camptodactyly and short stature (preliminary note). *Birth Defects: Original Article Series. Part III. Limb Malformations*. Edited by Bergsma D. New York, The National Foundation—March of Dimes 5:96-98, 1969.

¶ Wilson RV, Gaines DL, Brooks A, et al: Autosomal dominant inheritance of shortening of the flexor profundus muscle tendon unit with limitation of jaw excursion. *Birth Defects: Original Article Series. Part III. Limb Malformations*. Edited by Bergsma D. New York, The National Foundation—March of Dimes 5:99-102, 1969.
